# Supplementary material
Source: PubMed Central journal article supplement (PMC3710760)
Supplement: mmc1.pdf [file mmc1.pdf]

## Supplemental Data

### Intellectual Disability Is Associated with Increased Runs of Homozygosity in Simplex Autism

Ece D. Gamsiz, Emma W. Viscidi, Abbie M. Frederick, Shailender Nagpal, Stephan J. Sanders, Michael T. Murtha, Michael Schmidt, Simons Simplex Collection Genetics Consortium Elizabeth W. Triche, Daniel H. Geschwind, Matthew W. State, Sorin Istrail, Edwin H. Cook Jr., Bernie Devlin, and Eric M. Morrow

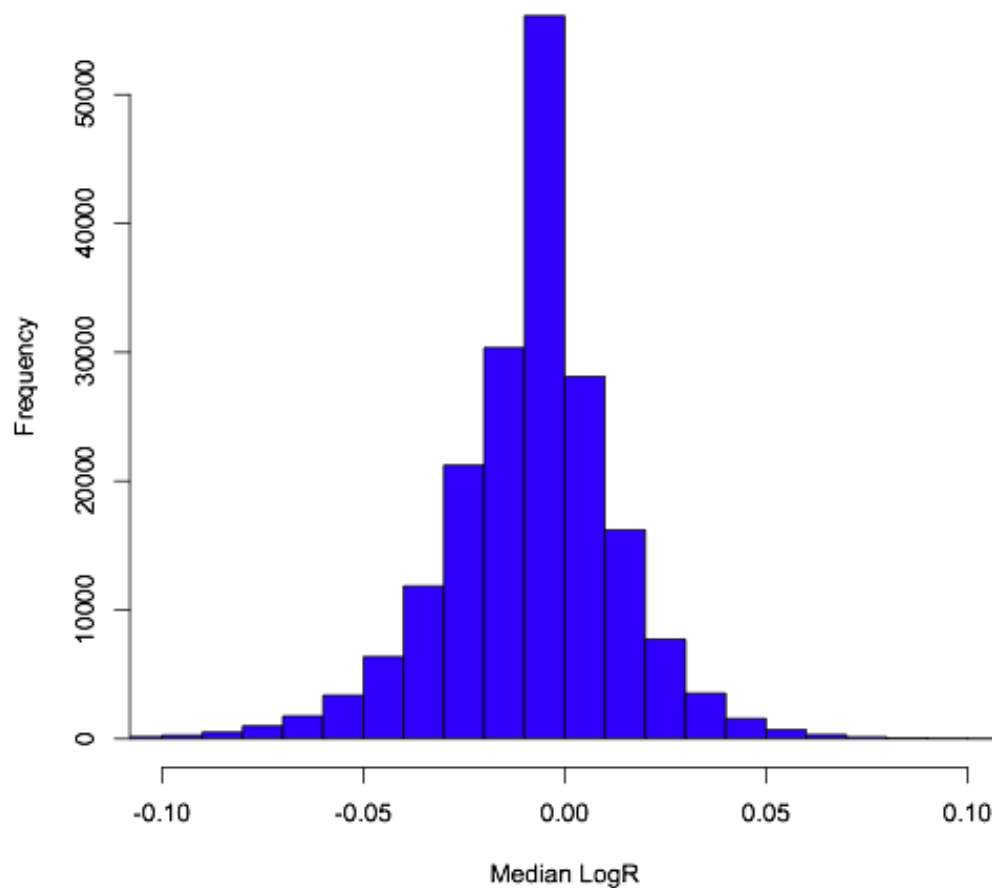

**Figure S1. Distribution of LogR Data for the Probes Contained within All Blocks of ROH**

Test for the presence of deletions within ROH blocks. LogR data regarding probe intensity for the probes contained within all blocks of ROH for the final segment size of 1000 kb or larger. Plotted are the number of probes (Y-axis) as compared to the LogR values reflecting the probe intensity values.

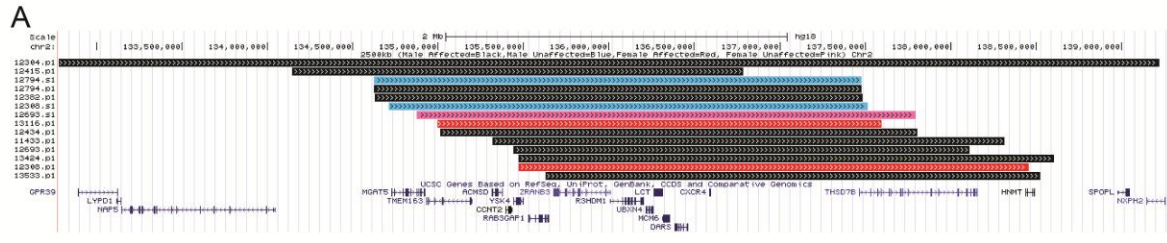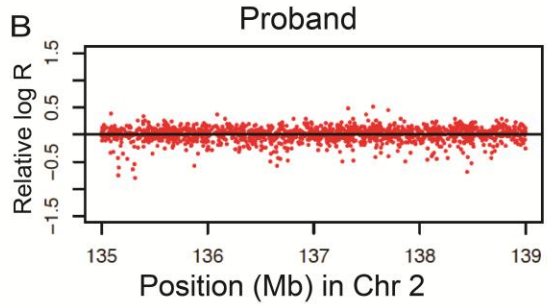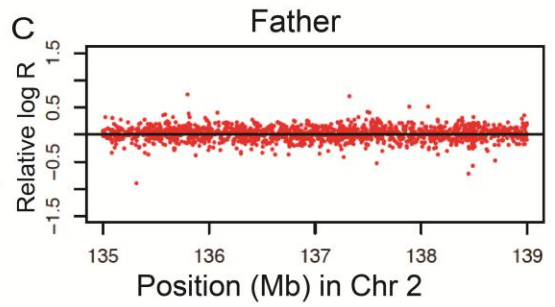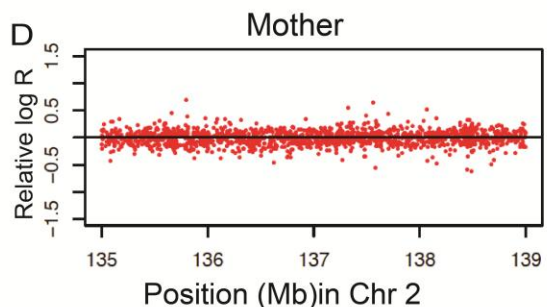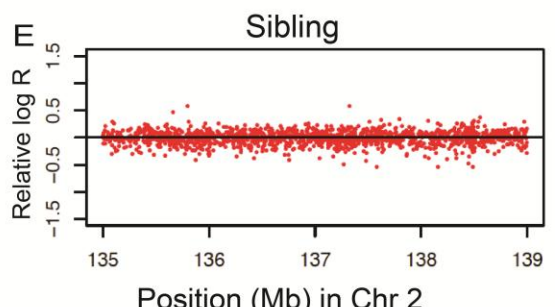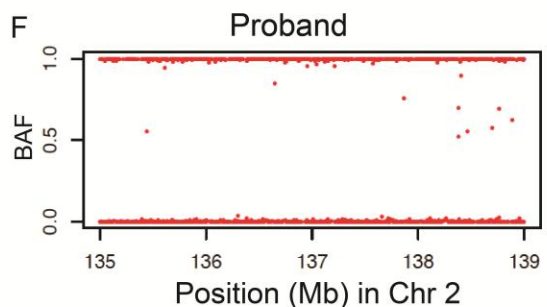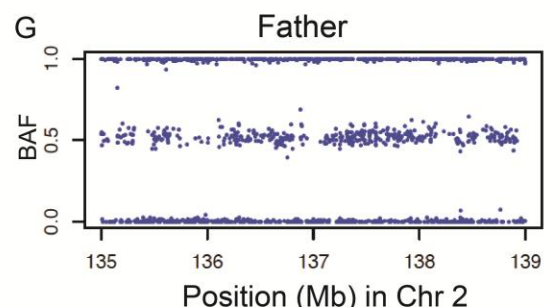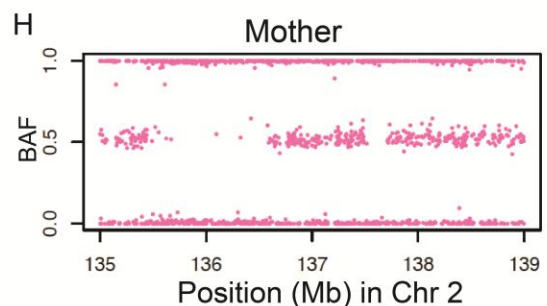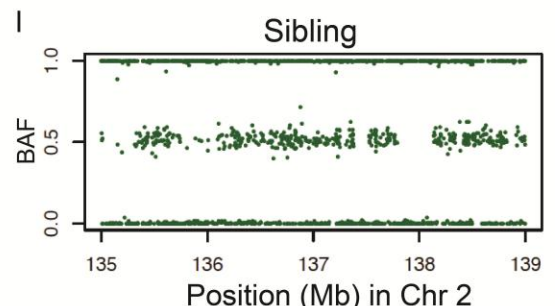

**Figure S2. Overlapping ROH Blocks in Chr2: 135,000,000–139,000,000 and Relative LogR and B Allele Frequency for Family 12304**

(A) Overlapping ROH blocks in chr2: 135,000,000–139,000,000 (hg18). (Male proband: black, female proband: red, male unaffected sibling: blue and female unaffected sibling: pink.)

(B–E) Relative logR for members of family 12304: (B) proband, (C) father, (D) mother and (E) unaffected sibling indicating no CNVs in the region for the proband.

(F–I) BAF for members of family 12304: (F) proband, (G) father, (H) mother and (I) unaffected sibling showing the homozygous block proband has in chr2: 132,782,514–139,222,178. Other family members are heterozygous in that region.

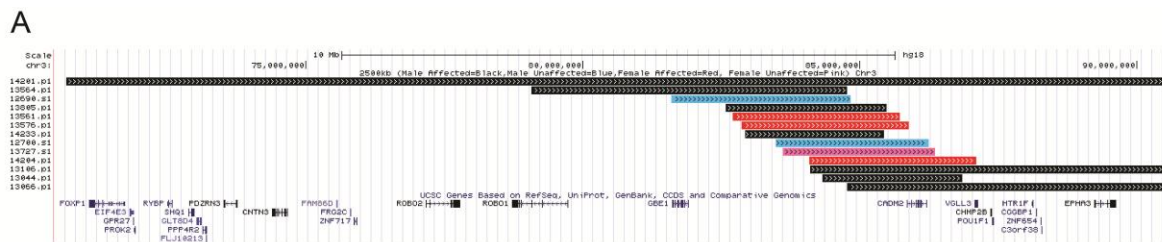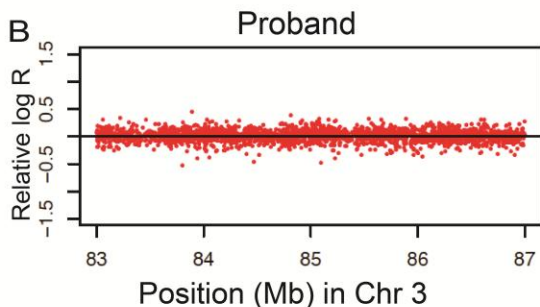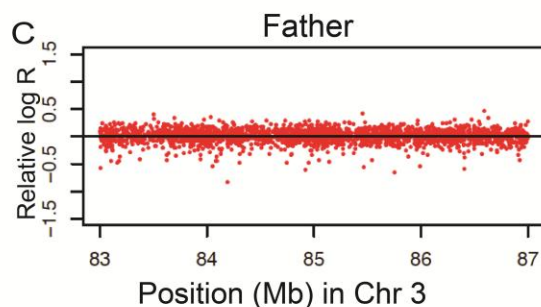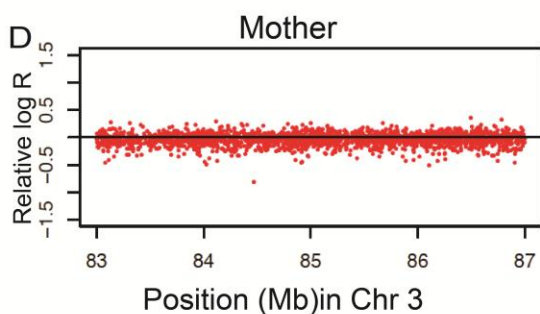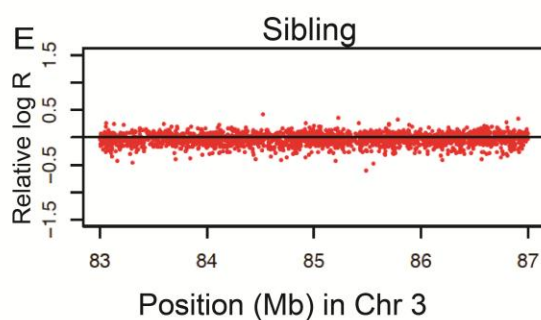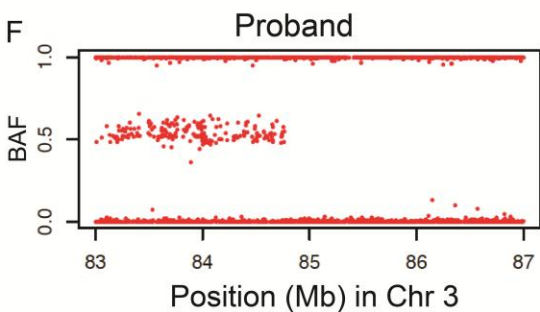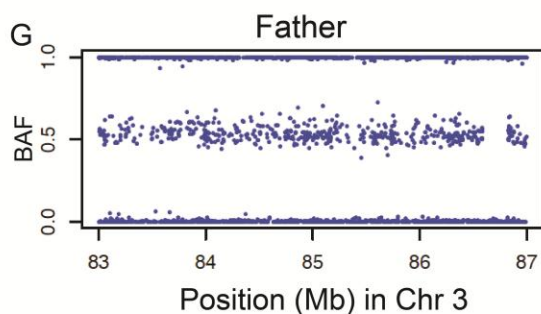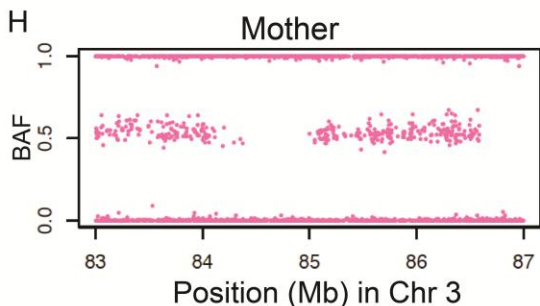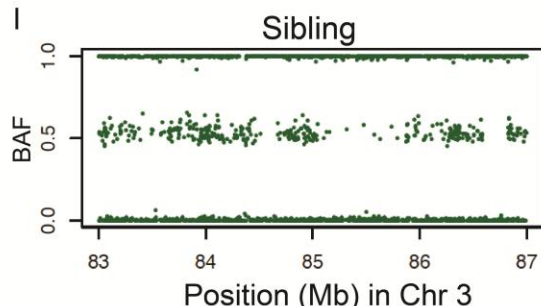

**Figure S3. Overlapping ROH Blocks in Chr3: 83,000,000–87,000,000 and Relative LogR and B Allele Frequency for Family 13066**

(A) Overlapping ROH blocks in chr3: 83,000,000–87,000,000 (hg18). (Male proband: black, female proband: red, male unaffected sibling: blue and female unaffected sibling: pink).

(B–E) Relative logR for members of family 13066: (B) proband, (C) father, (D) mother and (E) unaffected sibling indicating no CNVs in the region for the proband.

(F–I) BAF for members of family 13066: (F) proband, (G) father, (H) mother and (I) unaffected sibling showing the homozygous block proband has in chr3: 84,769,855–90,525,615. Other family members are heterozygous in that region.

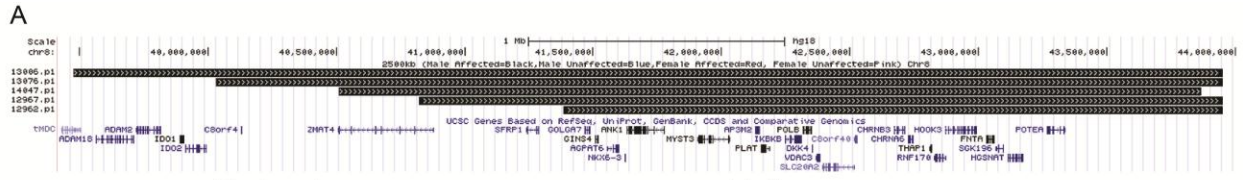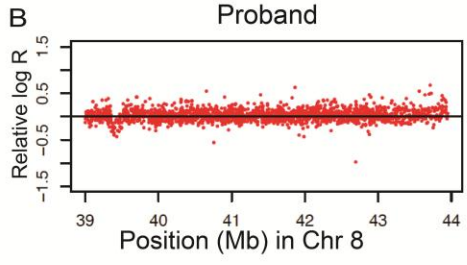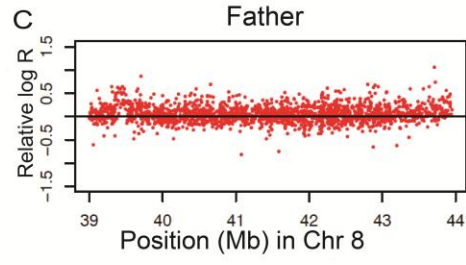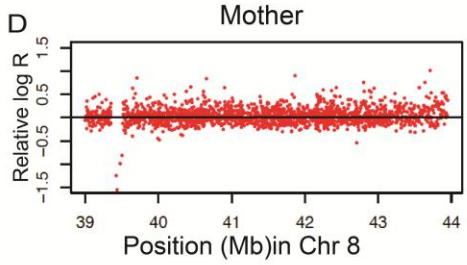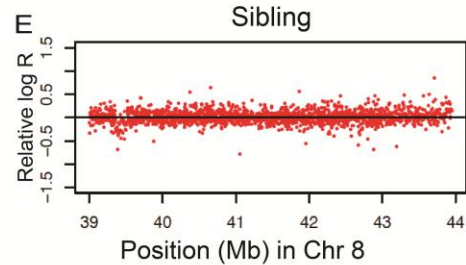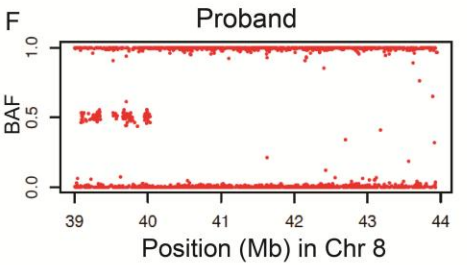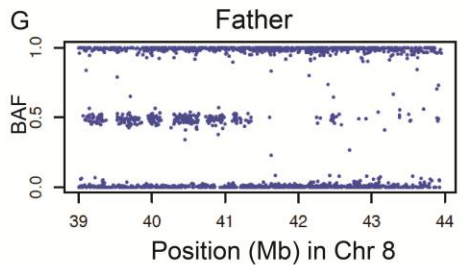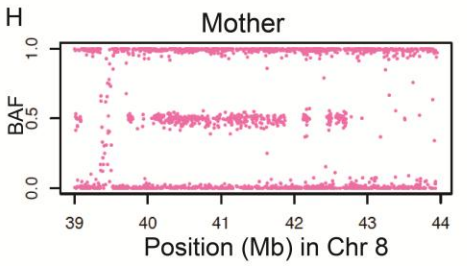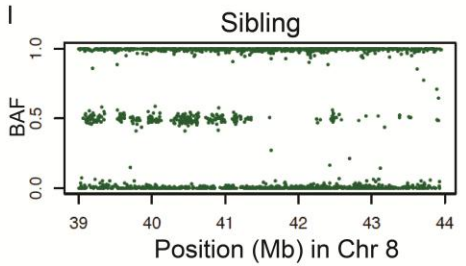

**Figure S4. Overlapping ROH Blocks in Chr8: 39,000,000–44,000,000 and Relative LogR and B Allele Frequency for Family 13076**

(A) Overlapping ROH blocks in chr8: 39,000,000–44,000,000 (hg18). (Male proband: black, female proband: red, male unaffected sibling: blue and female unaffected sibling: pink).

(B–E) Relative logR for members of family 13076: (B) proband, (C) father, (D) mother and (E) unaffected sibling indicating no CNVs in the homozygous region for the proband.

(F–I) BAF for members of family 13076: (F) proband, (G) father, (H) mother and (I) unaffected sibling showing the homozygous block proband has in chr8: 40,032,290–43,951,038. Other family members are heterozygous in that region.



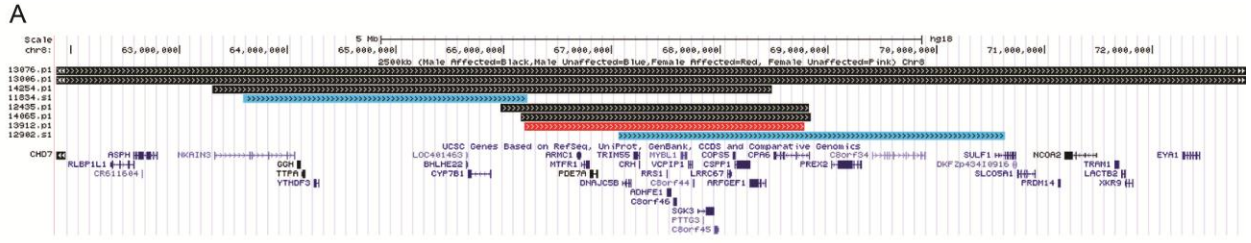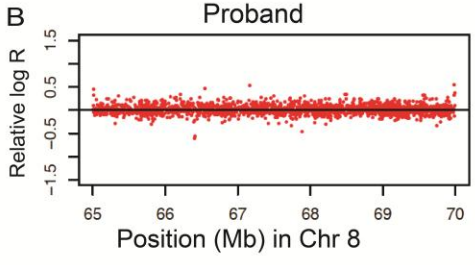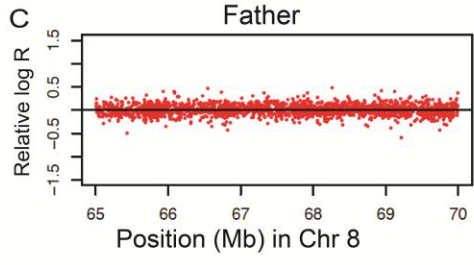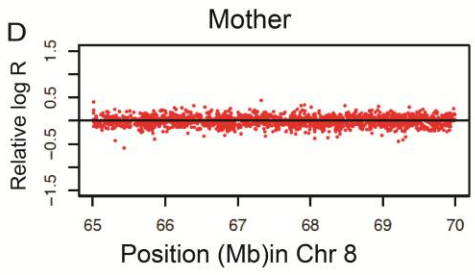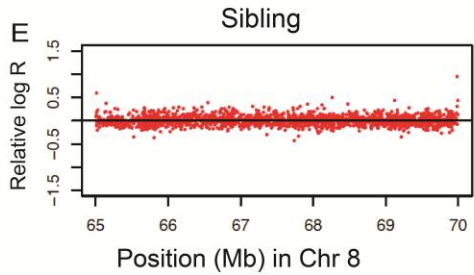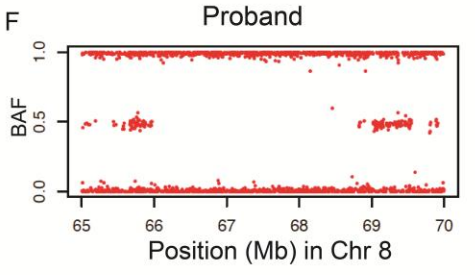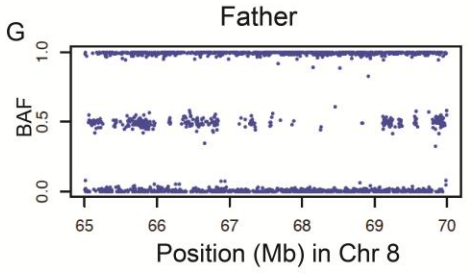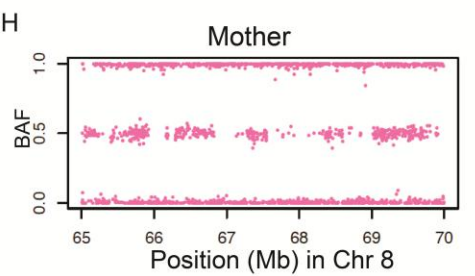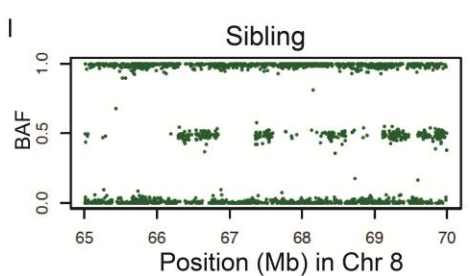



**Figure S5. Overlapping ROH Blocks in Chr8: 65,000,000–70,000,000 and Relative LogR and B Allele Frequency for Family 12435**

(A) Overlapping ROH blocks in chr8: 65,000,000–70,000,000 (hg18). (Male proband: black, female proband: red, male unaffected sibling: blue and female unaffected sibling: pink).

(B–E) Relative logR for members of family 12435: (B) proband, (C) father, (D) mother and (E) unaffected sibling indicating no CNVs in the region for the proband.

(F–I) BAF for members of family 12435: (F) proband, (G) father, (H) mother and (I) unaffected sibling showing the homozygous block proband has in chr8: 65,969,617–68,825,216. Other family members do not have that homozygous block.

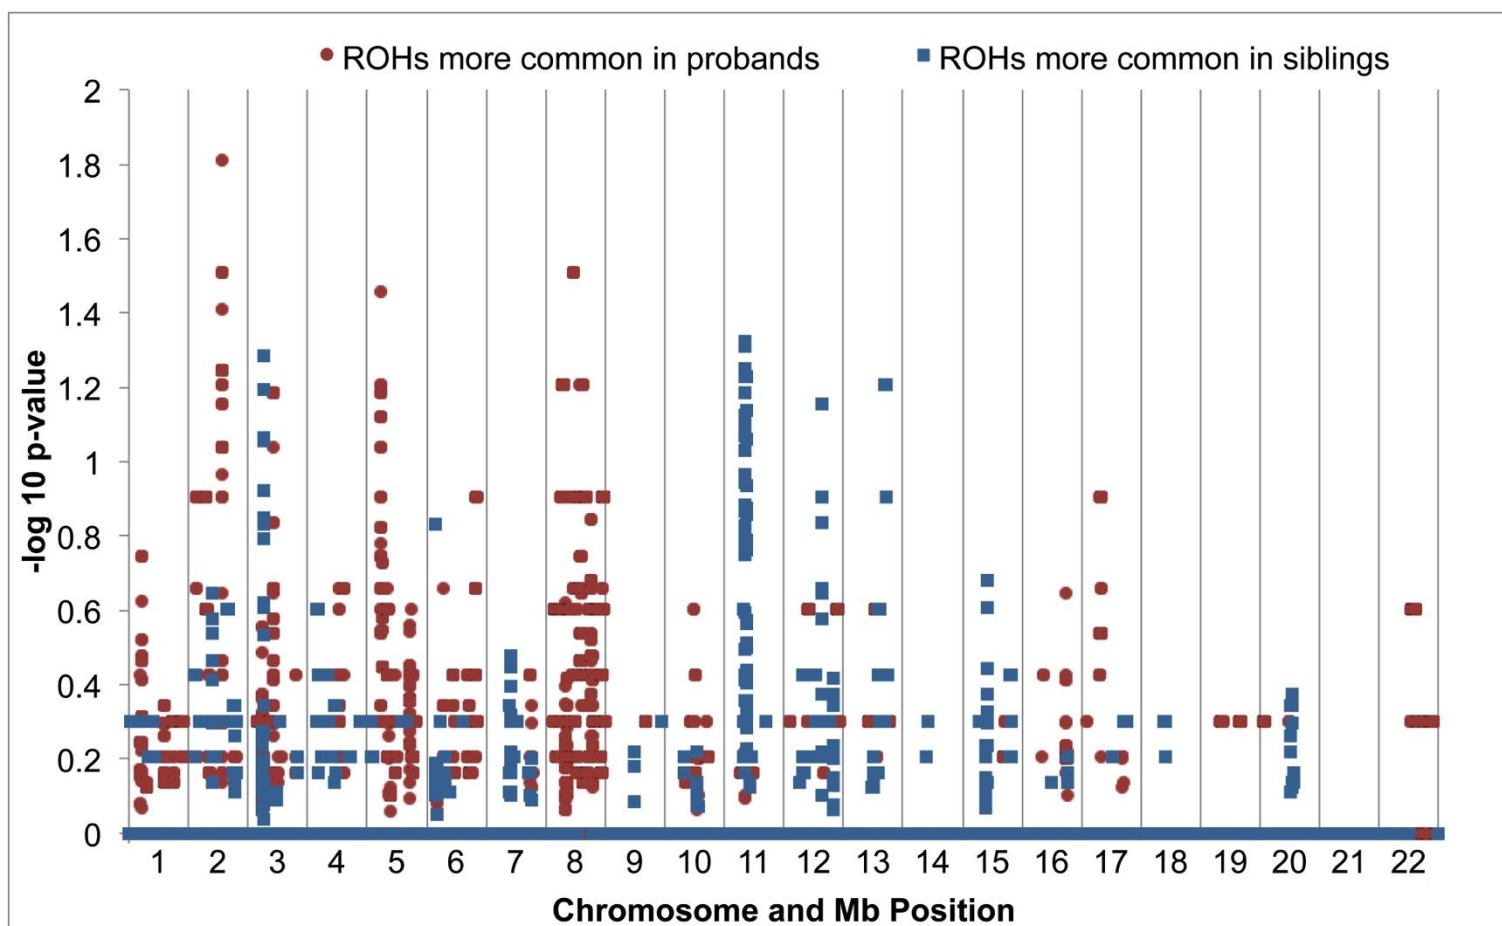

**Figure S6. Overlapping ROHs in Probands and Designated Siblings at 50 kb Intervals along the Genome (for Minimum Final Segment Size of 2500 kb)**

Plotted are the  $-\log_{10} p$  values of overlapping ROH blocks based on the Fisher exact test in R that the distribution of overlap deviates from the null hypothesis of equal overlap between probands and siblings. Given the unusually low SNP density on the Omni Array in the region of 16p11 (31-35 Mbp), data from the Omni Array in this region was not included in the study.

A

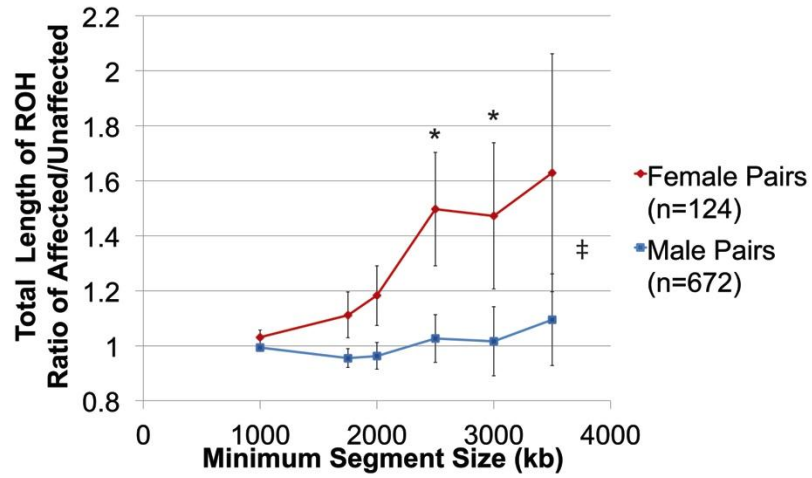

B

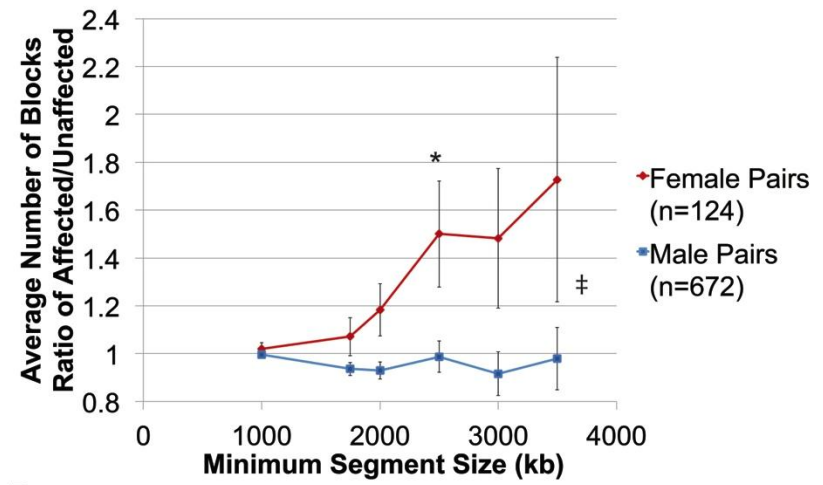

C

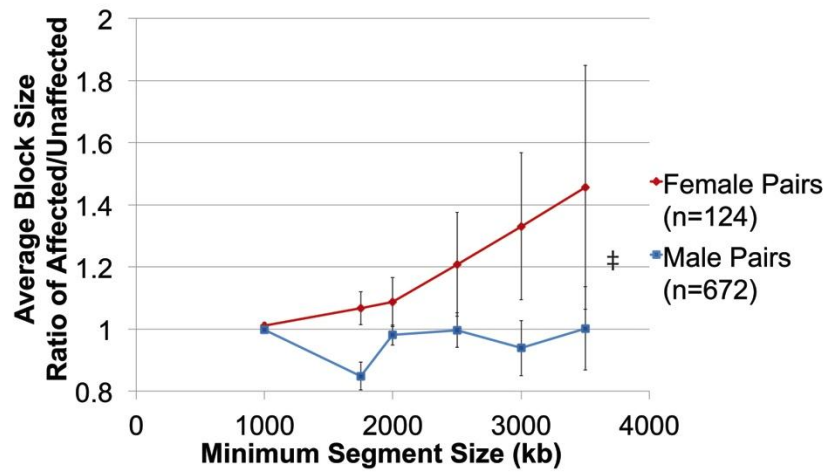

D

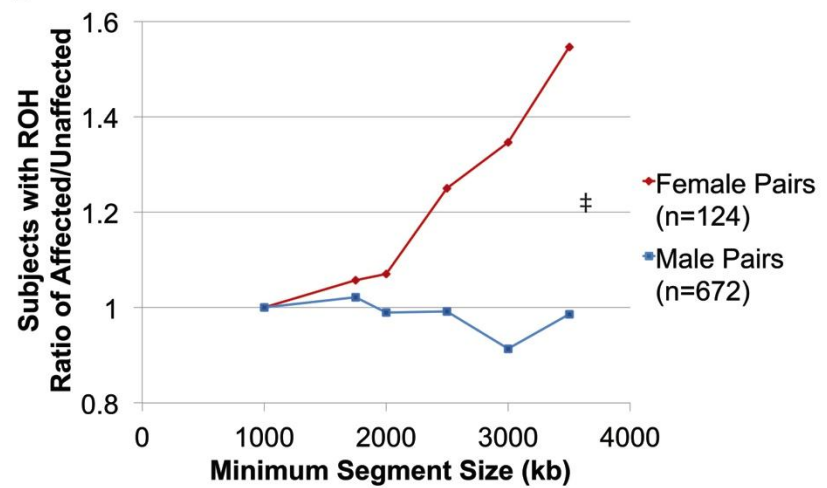

### **Figure S7. Autosomal ROH Burden Is Increased in Girls with Autism as Compared to Their Same-Sex Discordant Siblings in the SSC Data Set**

Autosomal ROH burden is increased in girls with autism (red) as compared to their unaffected female siblings in SSC dataset. This effect is not observed in boys with autism (blue) as compared to their unaffected male siblings.

(A) Total length of ROH. The ratio of total length of ROH per individual for the proband as compared to the designated unaffected sibling is plotted. Each ratio is plotted for different minimum segment sizes used to determine a block of ROH.

(B) Average number of blocks. Ratio of average number of blocks per individual for the proband as compared to the designated unaffected sibling is plotted.

(C) Average block size. Ratio of the average block size per individual for the proband as compared to the designated unaffected sibling is plotted.

(D) Proportion of subjects with at least one block of ROH. Ratio of the proportion of probands with at least one block as compared to the designated unaffected sibling is plotted.

Statistically significant p-values are shown in the graph. Conditional logistic regression analysis in STATA version 11.1 was performed comparing probands to their designated unaffected siblings. Error bars represent standard error of the mean. Ratios were computed in STATA version 11.1 with standard errors. Statistical significance of proportion of subjects with ROH was obtained by chi-square test.

\*Represent statistical significance, p-value < 0.05.

‡Represent statistical test if the curves for girls are different from curve for boys. p value <0.05. One-way ANOVA was performed to compare all data points for each curve. The p values for the ANOVAs were 0.0117 for A, 0.009 for B, 0.011 for C, and 0.025 for D. The numbers represented by n reflects the number of discordant sibling pairs contributed to the data.

Further information regarding this association analysis can be found in Table S6.

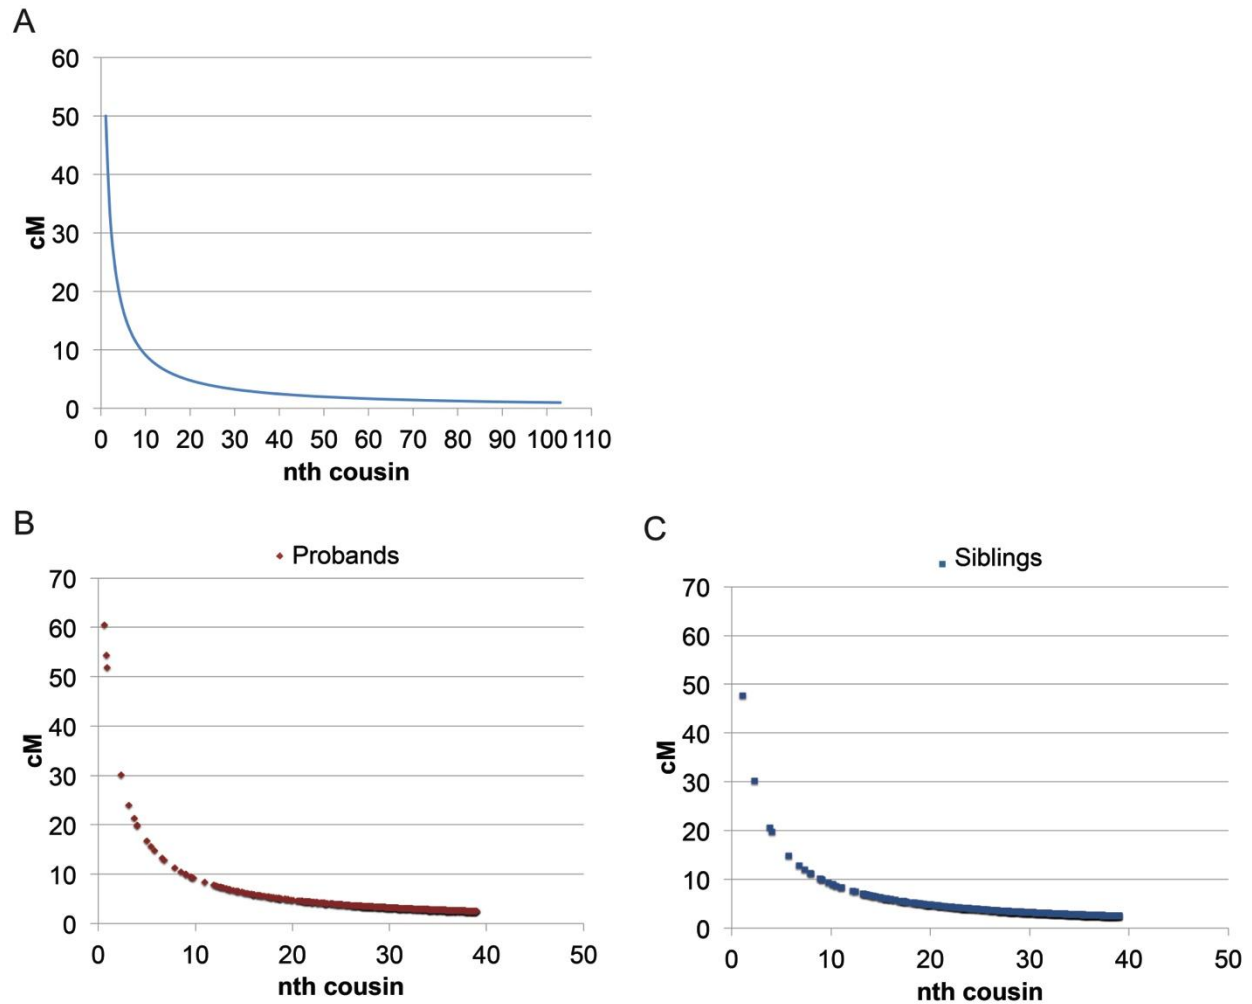

**Figure S8. Generational Age of ROH Blocks**

Generational age of autosomal ROH blocks of different length was estimated according to the methods described by Kong et al<sup>15</sup>.

(A) 1 centiMorgan (cM) in generic length was taken as 1Mb. If n is degree of cousins, average size of homozygous region shared is  $200/(2n+2)$ .

(B) Generational age of ROH blocks for probands for the minimum segment size of 2500 kb or larger. Each proband was represented by one ROH block. For probands with multiple ROH blocks, the longest block was chosen and the age of block was calculated.

(C) Generational age of ROH blocks for unaffected siblings for the minimum segment size of 2500 kb or larger. Each sibling was represented by one ROH block. For siblings with multiple ROH blocks, the longest block was chosen and the age of block was calculated.

**Table S1. An Increase in Burden of Autosomal ROH in Autism Probands with IQ ≤ 70 as Compared to Unaffected Siblings**

| IQ ≤ 70                                     |                        |                                   |            |         | IQ >70                   |                                    |            |         |
|---------------------------------------------|------------------------|-----------------------------------|------------|---------|--------------------------|------------------------------------|------------|---------|
| Minimum Segment Size (kb)                   | Probands± SE (n = 509) | Designated Sibling ± SE (n = 509) | Odds Ratio | P Value | Probands ± SE (n = 1110) | Designated Sibling ± SE (n = 1110) | Odds Ratio | P Value |
| <b>Average Total Length of ROH (Mb)</b>     |                        |                                   |            |         |                          |                                    |            |         |
| 1000                                        | 29.35±0.77             | 28.13±0.67                        | 1.17       | 0.006   | 28.61±0.44               | 28.65±0.43                         | 1.00       | 0.89    |
| 1750                                        | 7.14±0.5               | 6.20±0.35                         | 1.25       | 0.008   | 6.12±0.31                | 6.20±0.30                          | 0.97       | 0.64    |
| 2000                                        | 4.95±0.47              | 4.14±0.31                         | 1.25       | 0.019   | 4.03±0.3                 | 4.07±0.29                          | 0.98       | 0.78    |
| 2500                                        | 2.89±0.46              | 2.19±0.27                         | 1.27       | 0.034   | 2.11±0.29                | 2.10±0.28                          | 1.01       | 0.89    |
| 3000                                        | 1.93±0.44              | 1.42±0.26                         | 1.18       | 0.15    | 1.38±0.28                | 1.28±0.26                          | 1.09       | 0.35    |
| 3500                                        | 1.45±0.43              | 0.94±0.24                         | 1.22       | 0.15    | 1.1±0.27                 | 0.95±0.26                          | 1.15       | 0.17    |
| <b>Average Number of Blocks</b>             |                        |                                   |            |         |                          |                                    |            |         |
| 1000                                        | 20.82±0.44             | 20.36±0.42                        | 1.03       | 0.055   | 20.76±0.24               | 20.80±0.24                         | 1.00       | 0.80    |
| 1750                                        | 2.81±0.11              | 2.58±0.1                          | 1.11       | 0.013   | 2.53±0.06                | 2.59±0.06                          | 0.96       | 0.25    |
| 2000                                        | 1.63±0.08              | 1.47±0.07                         | 1.15       | 0.021   | 1.40±0.05                | 1.45±0.05                          | 0.95       | 0.26    |
| 2500                                        | 0.70±0.05              | 0.59±0.04                         | 1.23       | 0.018   | 0.53±0.03                | 0.55±0.03                          | 0.95       | 0.41    |
| 3000                                        | 0.34±0.04              | 0.30±0.03                         | 1.15       | 0.24    | 0.26±0.03                | 0.25±0.03                          | 1.04       | 0.71    |
| 3500                                        | 0.19±0.03              | 0.16±0.03                         | 1.27       | 0.17    | 0.16±0.02                | 0.15±0.02                          | 1.17       | 0.22    |
| <b>Average Block Length per Person (Mb)</b> |                        |                                   |            |         |                          |                                    |            |         |
| 1000                                        | 1.39±0.01              | 1.37±0.008                        | 8.18       | 0.071   | 1.36±0.008               | 1.36±0.009                         | 1.03       | 0.97    |
| 1750                                        | 2.07±0.05              | 1.96±0.05                         | 1.44       | 0.051   | 1.93±0.03                | 1.92±0.03                          | 1.04       | 0.78    |
| 2000                                        | 1.97±0.07              | 1.89±0.07                         | 1.15       | 0.27    | 1.71±0.04                | 1.76±0.04                          | 0.89       | 0.28    |
| 2500                                        | 1.40±0.09              | 1.33±0.08                         | 1.07       | 0.49    | 1.13±0.05                | 1.13±0.05                          | 0.99       | 0.93    |
| 3000                                        | 0.89±0.09              | 0.88±0.08                         | 1.01       | 0.91    | 0.72±0.05                | 0.72±0.05                          | 0.99       | 0.94    |
| 3500                                        | 0.56±0.09              | 0.57±0.08                         | 1.00       | 0.93    | 0.52±0.05                | 0.49±0.05                          | 1.06       | 0.50    |
| <b>Proportion of Subjects with ROH</b>      |                        |                                   |            |         |                          |                                    |            |         |
| 1000                                        | 1:1                    | 1:1                               |            | 1       | 1:1                      | 1:1                                |            | 1       |
| 1750                                        | 0.88:1                 | 0.84:1                            |            | 0.056   | 0.86:1                   | 0.85:1                             |            | 0.67    |
| 2000                                        | 0.73:1                 | 0.70:1                            |            | 0.21    | 0.66:1                   | 0.68:1                             |            | 0.76    |
| 2500                                        | 0.41:1                 | 0.39:1                            |            | 0.57    | 0.34:1                   | 0.34:1                             |            | 0.79    |
| 3000                                        | 0.21:1                 | 0.22:1                            |            | 0.89    | 0.17:1                   | 0.18:1                             |            | 0.74    |
| 3500                                        | 0.10:1                 | 0.11:1                            |            | 0.61    | 0.10:1                   | 0.10:1                             |            | 0.67    |

ROH was calculated using PLINK with varying minimum final segments of 1000 to 3500 kb. Average total length of ROH (Mb), average number of blocks, average block length and number of genes in ROH were calculated for probands with IQ ≤ 70 and IQ >70 as well as their unaffected siblings regardless of gender. A conditional logistic regression model in STATA version 11.1 was used to calculate statistical significance for average total length of ROH, average number of blocks and average block length per person. Odds Ratios were calculated for total length of ROH and average block size based on 5 Mb and 2.5 Mb incremental increases respectively. Statistical significance of proportion of subjects with ROH was obtained by chi-square test. Probands with IQ ≤ 70 were observed to have higher average number of blocks and higher average total length of ROH compared to their designated siblings ( $p < 0.05$ ) for final segments between 1000 and 2500 kb. No statistically significant difference was found in the comparison of probands with IQ >70 to their designated siblings in terms of ROH burden ( $p > 0.05$ ).

**Table S2. An Increase in Burden of Autosomal ROH in Autism Probands with IQ ≤ 55 and 55 ≤ IQ ≤ 70 as Compared to Unaffected Siblings**

| IQ ≤ 55                                     |                         |                                   |            |         | 55 ≤ IQ ≤ 70            |                                   |            |         |
|---------------------------------------------|-------------------------|-----------------------------------|------------|---------|-------------------------|-----------------------------------|------------|---------|
| Minimum Segment Size (kb)                   | Probands ± SE (n = 301) | Designated Sibling ± SE (n = 301) | Odds Ratio | P Value | Probands ± SE (n = 208) | Designated Sibling ± SE (n = 208) | Odds Ratio | P Value |
| <b>Average Total Length of ROH (Mb)</b>     |                         |                                   |            |         |                         |                                   |            |         |
| 1000                                        | 30.11±1.03              | 28.90±0.95                        | 1.20       | 0.012   | 28.26±1.16              | 27.10±0.90                        | 1.11       | 0.18    |
| 1750                                        | 7.43±0.66               | 6.49±0.53                         | 1.34       | 0.009   | 6.72±0.78               | 5.78±0.35                         | 1.13       | 0.27    |
| 2000                                        | 5.15±0.61               | 4.57±0.48                         | 1.23       | 0.076   | 4.66±0.74               | 3.52±0.28                         | 1.29       | 0.12    |
| 2500                                        | 3.03±0.59               | 2.55±0.43                         | 1.25       | 0.11    | 2.70±0.72               | 1.67±0.20                         | 1.33       | 0.15    |
| 3000                                        | 1.98±0.57               | 1.78±0.42                         | 1.11       | 0.43    | 1.84±0.71               | 0.89±0.16                         | 1.41       | 0.18    |
| 3500                                        | 1.47±0.55               | 1.30±0.39                         | 1.11       | 0.47    | 1.41±0.69               | 0.44±0.13                         | 1.74       | 0.10    |
| <b>Average Number of Blocks</b>             |                         |                                   |            |         |                         |                                   |            |         |
| 1000                                        | 21.29±0.60              | 20.74±0.58                        | 1.04       | 0.094   | 20.16±0.62              | 19.81±0.62                        | 1.03       | 0.33    |
| 1750                                        | 2.93±0.15               | 2.60±0.14                         | 1.18       | 0.005   | 2.62±0.16               | 2.56±0.15                         | 1.03       | 0.62    |
| 2000                                        | 1.70±0.10               | 1.55±0.10                         | 1.14       | 0.09    | 1.52±0.11               | 1.35±0.10                         | 1.16       | 0.11    |
| 2500                                        | 0.74±0.07               | 0.63±0.06                         | 1.25       | 0.07    | 0.64±0.08               | 0.51±0.06                         | 1.22       | 0.14    |
| 3000                                        | 0.36±0.06               | 0.35±0.05                         | 1.03       | 0.87    | 0.32±0.06               | 0.23±0.04                         | 1.32       | 0.16    |
| 3500                                        | 0.20±0.04               | 0.20±0.04                         | 0.97       | 0.90    | 0.18±0.05               | 0.09±0.03                         | 1.90       | 0.06    |
| <b>Average Block Length per Person (Mb)</b> |                         |                                   |            |         |                         |                                   |            |         |
| 1000                                        | 1.40±0.02               | 1.37±0.01                         | 33.1       | 0.026   | 1.37±0.02               | 1.36±0.009                        | 1.95       | 0.56    |
| 1750                                        | 2.13±0.06               | 2.02±0.07                         | 1.46       | 0.12    | 2.00±0.09               | 1.88±0.06                         | 1.40       | 0.23    |
| 2000                                        | 2.02±0.09               | 2.00±0.09                         | 1.05       | 0.78    | 1.93±0.12               | 1.73±0.09                         | 1.38       | 0.12    |
| 2500                                        | 1.48±0.11               | 1.43±0.11                         | 1.06       | 0.67    | 1.28±0.14               | 1.19±0.11                         | 1.09       | 0.58    |
| 3000                                        | 0.09±0.12               | 1.00±0.11                         | 0.94       | 0.67    | 0.84±0.14               | 0.74±0.11                         | 1.10       | 0.52    |
| 3500                                        | 0.60±0.12               | 0.73±0.11                         | 0.84       | 0.24    | 0.51±0.13               | 0.33±0.09                         | 1.26       | 0.24    |
| <b>Proportion of Subjects with ROH</b>      |                         |                                   |            |         |                         |                                   |            |         |
| 1000                                        | 1:1                     | 1:1                               |            | 1       | 1:1                     | 1:1                               |            | 1       |
| 1750                                        | 0.91:1                  | 0.84:1                            |            | 0.01    | 0.85:1                  | 0.84:1                            |            | 0.89    |
| 2000                                        | 0.75:1                  | 0.72:1                            |            | 0.35    | 0.71:1                  | 0.67:1                            |            | 0.40    |
| 2500                                        | 0.44:1                  | 0.40:1                            |            | 0.46    | 0.38:1                  | 0.38:1                            |            | 1.00    |
| 3000                                        | 0.22:1                  | 0.23:1                            |            | 0.85    | 0.20:1                  | 0.20:1                            |            | 1.00    |
| 3500                                        | 0.11:1                  | 0.14:1                            |            | 0.26    | 0.09:1                  | 0.07:1                            |            | 0.59    |

ROH was calculated using PLINK with varying minimum final segments of 1000-3500 kb. Average total length of ROH (Mb), average number of blocks, average block length and number of genes in ROH were calculated for probands with IQ ≤ 55 and 55 ≤ IQ ≤ 70 as well as their unaffected siblings regardless of gender. A conditional logistic regression model in STATA version 11.1 was used to calculate statistical significance for average total length of ROH, average number of blocks and average block length per person. Odds Ratios were calculated for total length of ROH and average block size based on per 5 Mb and 2.5 Mb incremental increases respectively. Statistical significance of proportion of subjects with ROH was obtained by chi-square test. Probands with IQ ≤ 55 were observed to have higher average total length of ROH compared to their designated siblings ( $p < 0.05$ ) for final segments between 1000 and 1750 kb and higher average number of blocks for final segment of 1750 kb. No statistically significant difference was found in the comparison of probands with 55 ≤ IQ ≤ 70 to their designated siblings although there is an increase in the burden of ROH ( $p > 0.05$ ).



**Table S3. List of Genes within the Loci Recurrent in Autism with p Value Less Than 0.2 Shown in Figure S3**

| Chr # | Start (hg18) | End (hg18) | Interval Length (kb) | Number of Proband | Number of Siblings | Genes                                                                                                                                      | Proband ID (Full-Scale IQ)                                                                                                                                                                                                                                                                                       |
|-------|--------------|------------|----------------------|-------------------|--------------------|--------------------------------------------------------------------------------------------------------------------------------------------|------------------------------------------------------------------------------------------------------------------------------------------------------------------------------------------------------------------------------------------------------------------------------------------------------------------|
| 1     | 52650000     | 52900000   | 250                  | 7                 | 2                  | <i>PRPF38A, ZCCHC11, GPX7, FAM159A</i>                                                                                                     | 11601.p1(91), 12331.p1(115), 12715.p1(105), 13093.p1(167), <b>13096.p1(107)</b> , 13101.p1(94), <b>13188.p1(78)</b>                                                                                                                                                                                              |
| 2     | 30450000     | 31100000   | 650                  | 4                 | 0                  | <i>LCLAT1, CAPN13, GALNT14</i>                                                                                                             | 12113.p1(66), 12356.p1(113), 12597.p1(70), 12956.p1(84)                                                                                                                                                                                                                                                          |
| 2     | 73000000     | 74050000   | 1050                 | 4                 | 0                  | <i>EMX1, SFXN5, RAB11FIP5, SMYD5, PRADC1, CCT7, FBXO41, EGR4, ALMS1, NAT8, ALMS1P, NAT8B, TPRKB, DUSP11, C2orf78, STAMBP, ACTG2, DGUOK</i> | <b>13741.p1(47)</b> , 13781.p1(102), 13948.p1(44), 14227.p1(47)                                                                                                                                                                                                                                                  |
| 2     | 135450000    | 138500000  | 3050                 | 11                | 3                  | <i>MAP3K19, RAB3GAP1, ZRANB3, R3HDM1, UBXN4, LCT, MCM6, DARS, CXCR4, THSD7B, HNMT</i>                                                      | <b>11433.p1(78)</b> , <b>12304.p1(83)</b> , <b>12308.p1(105)</b> , 12382.p1(91), <b>12415.p1(94)</b> , 12434.p1(117), 12693.p1(94), <b>12794.p1(96)</b> , <b>13116.p1(35)</b> , <b>13424.p1(114)</b> , 13533.p1(47)                                                                                              |
| 3     | 84650000     | 85450000   | 800                  | 10                | 3                  | <i>CADM2</i>                                                                                                                               | 14233.p1(13), 14204.p1(61), 14201.p1(43), 13805.p1(93), <b>13576.p1(40)</b> , 13561.p1(51), <b>13564.p1(117)</b> , 13106.p1(100), 13066.p1(120), 13044.p1(112)                                                                                                                                                   |
| 5     | 41400000     | 41650000   | 250                  | 5                 | 0                  | <i>PLCXD3</i>                                                                                                                              | <b>12582.p1(57)</b> , <b>12642.p1(99)</b> , 13750.p1(126), 14084.p1(86), 14484.p1(72),                                                                                                                                                                                                                           |
| 5     | 42450000     | 44100000   | 1650                 | 17                | 8                  | <i>GHR, CCDC152, SEPP1, ANXA2R, ZNF131, HMGCS1, CCL28, C5orf28, C5orf34, PAIP1, NNT</i>                                                    | 12044.p1(72), <b>12073.p1(110)</b> , <b>12086.p1(118)</b> , 12240.p1(91), 12339.p1(43), <b>12340.p1(26)</b> , <b>12582.p1(57)</b> , <b>12603.p1(23)</b> , <b>12642.p1(99)</b> , <b>12689.p1(116)</b> , 13023.p1(115), <b>13416.p1(79)</b> , 13750.p1(126), 13830.p1(7), 13882.p1(74), 14084.p1(86), 14484.p1(72) |

|   |           |           |      |    |   |                                                                                                                                                                              |                                                                                                                                                                                                                                                                                 |
|---|-----------|-----------|------|----|---|------------------------------------------------------------------------------------------------------------------------------------------------------------------------------|---------------------------------------------------------------------------------------------------------------------------------------------------------------------------------------------------------------------------------------------------------------------------------|
| 5 | 44250000  | 44450000  | 200  | 14 | 7 | <i>FGF10</i>                                                                                                                                                                 | 12044.p1(72), <b>12073.p1(110)</b> ,<br>12086.p1(118), 12240.p1(91),<br>12339.p1(43), <b>12340.p1(26)</b> ,<br><b>12582.p1(57)</b> , <b>12603.p1(23)</b> ,<br><b>12642.p1(99)</b> , <b>12689.p1(116)</b> ,<br>13023.p1(115), <b>13416.p1(79)</b> ,<br>13830.p1(7), 13882.p1(74) |
| 6 | 142250000 | 142900000 | 650  | 4  | 0 | <i>NMBR, VTA1, GPR126</i>                                                                                                                                                    | <b>13166.p1(46)</b> , <b>12875.p1(64)</b> , <b>13116.p1(35)</b> , <b>12219.p1(121)</b>                                                                                                                                                                                          |
| 8 | 35050000  | 35450000  | 400  | 4  | 0 | <i>UNC5D</i>                                                                                                                                                                 | 12289.p1(101), 13006.p1(56),<br><b>13083.p1(52)</b> , 14334.p1(58)                                                                                                                                                                                                              |
| 8 | 40800000  | 44000000  | 3200 | 5  | 0 | <i>ZMAT4, SFRP1, GOLGA7, GINS4, AGPAT6, ANK1, KAT6A, AP3M2, PLAT, IKBKB, POLB, DKK4, VDAC1P5, SLC20A2, SMIM19, CHRNB3, CHRNA6, THAP1, RNF170, HOOK3, FNTA, HGSNAT, POTEA</i> | <b>12962.p1(79)</b> , 12967.p1(88),<br>13006.p1(56), <b>13076.p1(89)</b> ,<br>14047.p1(91)                                                                                                                                                                                      |
| 8 | 66150000  | 68500000  | 2350 | 6  | 1 | <i>ARMC1, MTFR1, PDE7A, DNAJC5B, TRIM55, CRH, RRS1, ADHFE1, C8orf46, MYBL1, VCPIP1, C8orf44, SGK3, PTTG3P, MCMD2, SNHG6, SNORD87, PPP1R42, COPS5, CSPP1, ARFGEF1, CPA6</i>   | <b>12435.p1(47)</b> , 13006.p1(56),<br><b>13076.p1(89)</b> , <b>13912.p1(95)</b> ,<br>14065.p1(27), 14254.p1(17)                                                                                                                                                                |
| 8 | 80900000  | 81100000  | 200  | 4  | 0 | <i>MRPS28, TPD52</i>                                                                                                                                                         | <b>12655.p1(48)</b> , 13006.p1(56),<br><b>13076.p1(89)</b> , <b>13741.p1(47)</b>                                                                                                                                                                                                |
| 8 | 84050000  | 85250000  | 1200 | 7  | 2 |                                                                                                                                                                              | <b>12463.p1(84)</b> , 12655.p1(48),<br><b>12962.p1(79)</b> , 13006.p1(56),<br><b>13076.p1(89)</b> , <b>13575.p1(103)</b> ,<br><b>13741.p1(47)</b>                                                                                                                               |
| 8 | 87350000  | 87700000  | 350  | 7  | 2 | <i>WWP1, RMDN1, CPNE3, CNGB3</i>                                                                                                                                             | <b>11834.p1(76)</b> , <b>12655.p1(48)</b> ,<br><b>12962.p1(79)</b> , 13006.p1(56),<br><b>13076.p1(89)</b> , <b>13741.p1(47)</b> ,<br>14241.p1(24)                                                                                                                               |
| 8 | 90450000  | 90900000  | 450  | 5  | 0 | <i>RIPK2</i>                                                                                                                                                                 | <b>11834.p1(76)</b> , <b>12655.p1(48)</b> ,<br>13006.p1(56), <b>13076.p1(89)</b> ,<br><b>13741.p1(47)</b>                                                                                                                                                                       |

|    |           |           |      |    |   |                                                                                                                                                                                                                                                                                   |                                                                                                                                                                                                                          |
|----|-----------|-----------|------|----|---|-----------------------------------------------------------------------------------------------------------------------------------------------------------------------------------------------------------------------------------------------------------------------------------|--------------------------------------------------------------------------------------------------------------------------------------------------------------------------------------------------------------------------|
| 8  | 94000000  | 99450000  | 5450 | 4  | 0 | <i>TRIQQ, C8orf87, FAM92A1, RBM12B, TMEM67, PDP1, CDH17, GMNN, RAD54B, FSBP, KIAA1429, ESRP1, DPY19L4, INTS8, CCNE2, NDUFAF6, TP53INP1, PLEKHF2, C8orf37, GDF6, UQCRB, MTERFD1, PTDSS1, SDC2, CPQ, TSPYL5, MTDH, LAPT4B, MATN2, RPL30, SNORA72, C8orf47, HRSP12, BVES, NIPAL2</i> | <b>12655.p1(48)</b> , 13006.p1(56), <b>13076.p1(89)</b> , <b>13741.p1(47)</b>                                                                                                                                            |
| 8  | 112300000 | 112450000 | 150  | 12 | 5 |                                                                                                                                                                                                                                                                                   | 11491.p1(53), 11573.p1(68), 11765.p1(34), <b>12368.p1(47)</b> , <b>12655.p1(48)</b> , 13006.p1(56), 13277.p1(101), <b>13582.p1(83)</b> , <b>13587.p1(78)</b> , <b>13682.p1(71)</b> , <b>13706.p1(67)</b> , 14108.p1(115) |
| 8  | 139900000 | 144000000 | 4100 | 4  | 0 | <i>COL22A1, KCNK9, TRAPPC9, CHRAC1, AGO2, PTK2, DENND3, SLC45A4, GPR20, PTP4A3, MROH5, TSNARE1, BAI1, ARC, JRK, PSCA, LY6K, THEM6, SLURP1, LYPD2, LYNX1, LY6D, GML, CYP11B1, CYP11B2</i>                                                                                          | 12170.p1(80), <b>12655.p1(48)</b> , 13006.p1(56), <b>13076.p1(89)</b>                                                                                                                                                    |
| 17 | 24200000  | 24400000  | 200  | 6  | 1 | <i>ERAL1, FLOT2, DHRS13, PHF12, SEZ6, PIPOX</i>                                                                                                                                                                                                                                   | <b>12228.p1(108)</b> , 12597.p1(70), <b>13005.p1(117)</b> , 13393.p1(77), <b>13774.p1(33)</b> , 14249.p1(78)                                                                                                             |
| 17 | 26100000  | 26700000  | 600  | 6  | 1 | <i>SUZ12P1, CRLF3, ATAD5, TEFM, ADAP2, RNF135, DPRXP4, NF1, OMG, EVI2B, EVI2A</i>                                                                                                                                                                                                 | <b>12228.p1(108)</b> , 12597.p1(70), <b>13005.p1(117)</b> , 13393.p1(77), <b>13774.p1(33)</b> , 14249.p1(78)                                                                                                             |

Genome was divided into 50 kb segments and in each segment number of probands and siblings with ROH (minimum segment > 2500 kb) were calculated. P-value was calculated via Fisher exact test in R. Regions with p-value less than 0.2 were shown. The Proband ID column lists all SSC probands that had a block of ROH across the indicated region. Bolding signifies the subjects for whom we had whole exome sequencing data available in the publically available exome sequencing dataset<sup>18;19;20</sup>. The participants full scale IQ is shown in brackets.

**Table S4. List of Variants Found in Whole-Exome Data Analysis under the ROH Regions More Common in Proband Compared to Siblings**

| Gene            | Subject ID | Position        | Build | REF/ALT | AA change | Prediction (Polyphen or EVS)            | Existing SNP ID (Y/N) | MAF% (EA/AA/AAL;European/American/African American/All) | SNP ID      | Experimental Validation (Validated=V, Not Validated=NV, Not Tested=NT) | Proband-VCF data (GT:GQ:DP) | Mother-VCF data (GT:GQ:DP) | Father-VCF data (GT:GQ:DP) | Designated Sibling-VCF data (GT:GQ:DP) | Full IQ | Gender |
|-----------------|------------|-----------------|-------|---------|-----------|-----------------------------------------|-----------------------|---------------------------------------------------------|-------------|------------------------------------------------------------------------|-----------------------------|----------------------------|----------------------------|----------------------------------------|---------|--------|
| <b>ADAM8</b>    | 13076.p1   | chr10:135085088 | hg19  | C/T     | V/M       | missense, probably damaging             | Y                     | 0.49                                                    | rs36054052  | V                                                                      | 1/1:84:38                   | 0/1:109:21                 |                            | 1/1:60:26                              | 89      | male   |
| <b>ADH1C</b>    | 13039.p1   | chr4:100268190  | hg19  | A/C     | */G       | stop-lost                               | Y                     | 1.1636/0.2043/0.8385                                    | rs283413    | NT                                                                     | 1/1:184:102                 | 1/1:182:78                 | 1/1:188:92                 | 1/1:180:99                             | 121     | male   |
| <b>ADH1C</b>    | 13418.p1   | chr4:100268190  | hg19  | A/C     | */G       | stop-lost                               | Y                     | 1.1636/0.2043/0.8385                                    | rs283413    | NT                                                                     | 1/1:209:106                 | 1/1:194:107                | 1/1:198:110                | 1/1:189:135                            | 135     | male   |
| <b>BMP3</b>     | 13076.p1   | chr4:81967188   | hg19  | C/T     | F/L       | missense, possibly damaging             | Y                     | 0.0/0.3177/0.1076                                       | rs6831040   | V                                                                      | 1/1:220:87                  | 1/1:114:44                 | 1/1:60:23                  | 1/1:141:55                             | 89      | male   |
| <b>BMP5</b>     | 13175.p1   | chr6:55620456   | hg19  | C/T     | V/I       | missense, probably damaging             | N                     | 0                                                       |             | NT                                                                     | 1/1:225:91                  | 0/1:228:99                 | 0/1:228:106                | 0/1:228:109                            | 63      | male   |
| <b>C1orf27</b>  | 13076.p1   | chr1:186360840  | hg19  | C/T     | R/C       | missense, probably damaging             | N                     | 0                                                       |             | NT                                                                     | 1/1:225:159                 | 0/1:228:91                 | 0/1:228:34                 |                                        | 89      | male   |
| <b>C2orf47</b>  | 13618.p1   | chr2:200532750  | hg18  | C/T     | T/I       | missense, possibly damaging             | Y                     | 0.0465/0.0227/0.0384                                    | rs150048783 | NT                                                                     | 1/1:225:96                  | 0/1:122:132                | 0/1:81:116                 | 0/1:152:116                            | 44      | female |
| <b>C5orf34</b>  | 12689.p1   | chr5:43509348   | hg19  | T/A     | S/T       | missense, possibly damaging             | Y                     | 0.0/1.5887/0.5382                                       | rs6872851   | V                                                                      | 1/1:81:30                   | 1/1:105:39                 | 1/1:87:31                  | 1/1:96:35                              | 116     | female |
| <b>C5orf34</b>  | 12073.p1   | chr5:43509348   | hg19  | T/A     | S/T       | missense, possibly damaging             | Y                     | 0.0/1.5887/0.5382                                       | rs6872851   | V                                                                      | 1/1:225:94                  | 1/1:225:122                | 1/1:225:116                |                                        | 110     | female |
| <b>C5orf34</b>  | 12603.p1   | chr5:43509348   | hg19  | T/A     | S/T       | missense, possibly damaging             | Y                     | 0.0/1.5887/0.5382                                       | rs6872851   | V                                                                      | 1/1:225:104                 | 1/1:120:44                 | 1/1:214:76                 |                                        | 23      | male   |
| <b>C5orf34</b>  | 12582.p1   | chr5:43509348   | hg19  | T/A     | S/T       | missense, possibly damaging             | Y                     | 0.0/1.5887/0.5382                                       | rs6872851   | V                                                                      | 1/1:108:42                  | 1/1:126:46                 | 1/1:120:44                 | 1/1:138:52                             | 57      | male   |
| <b>C5orf34</b>  | 12642.p1   | chr5:43509348   | hg19  | T/A     | S/T       | missense, possibly damaging             | Y                     | 0.0/1.5887/0.5382                                       | rs6872851   | V                                                                      | 1/1:78:29                   | 1/1:72:31                  | 1/1:81:31                  | 1/1:102:40                             | 99      | male   |
| <b>C5orf34</b>  | 12340.p1   | chr5:43545105   | hg18  | T/A     | S/T       | missense, possibly damaging             | Y                     | 0.0/1.5887/0.5382                                       | rs6872851   | NT                                                                     | 1/1:120:43                  | 1/1:225:86                 | 1/1:157:57                 | 1/1:225:87                             | 26      | female |
| <b>C5orf34*</b> | 12689.p1   | chr5:43509463   | hg19  |         |           | C insertion in 5'-UTR                   | N                     | 0                                                       |             | V                                                                      |                             |                            |                            |                                        | 116     | female |
| <b>C5orf34*</b> | 12073.p1   | chr5:43509463   | hg19  |         |           | C insertion in 5'-UTR                   | N                     | 0                                                       |             | V                                                                      |                             |                            |                            |                                        | 110     | female |
| <b>C5orf34*</b> | 12603.p1   | chr5:43509463   | hg19  |         |           | C insertion in 5'-UTR                   | N                     | 0                                                       |             | V                                                                      |                             |                            |                            |                                        | 23      | male   |
| <b>C5orf34*</b> | 12582.p1   | chr5:43509463   | hg19  |         |           | C insertion in 5'-UTR                   | N                     | 0                                                       |             | V                                                                      |                             |                            |                            |                                        | 57      | male   |
| <b>C5orf34*</b> | 12642.p1   | chr5:43509463   | hg19  |         |           | C insertion in 5'-UTR                   | N                     | 0                                                       |             | V                                                                      |                             |                            |                            |                                        | 99      | male   |
| <b>CENPC1</b>   | 13076.p1   | chr4:68378287   | hg19  | C/A     | V/G       | missense-near-splice, probably-damaging | Y                     | 0.0247/1.2291/0.3941                                    | rs141379239 | V                                                                      | 1/1:225:277                 | 0/1:193:159                | 0/1:91:86                  | 1/1:225:227                            | 89      | male   |
| <b>COL7A1</b>   | 12926.p1   | chr3:48608103   | hg19  | G/C     | P/R       | missense, possibly damaging             | Y                     | 0.46                                                    | rs185142403 | NT                                                                     | 1/1:51:21                   | 0/1:39:15                  | 0/1:65:13                  |                                        |         | male   |
| <b>CSMD3</b>    | 13582.p1   | chr8:113299353  | hg19  | A/G     | S/P       | missense, probably damaging             | Y                     | 0.0581/0.1816/0.1                                       | rs145027071 | NT                                                                     | 1/1:225:83                  | 1/1:225:78                 | 0/1:163:82                 | 1/1:137:73                             | 83      | male   |
| <b>CYP39A1</b>  | 13175.p1   | chr6:46604145   | hg19  | G/C     | S/C       | missense, possibly damaging             | Y                     | 0.6059/0.0454/0.4159                                    | rs147866724 | NT                                                                     | 1/1:181:72                  | 0/1:228:81                 | 0/1:228:91                 |                                        | 63      | male   |

|                 |          |                 |      |     |      |                             |   |                       |             |    |             |             |             |             |      |      |
|-----------------|----------|-----------------|------|-----|------|-----------------------------|---|-----------------------|-------------|----|-------------|-------------|-------------|-------------|------|------|
| <b>DNAH7</b>    | 11055.p1 | chr2:196651764  | hg19 | C/A | Q/H  | missense, probably damaging | N | 0                     |             | NT | 1/1:225:86  | 0/1:228:127 | 0/1:228:105 | 28          | male |      |
| <b>DYNC2H1</b>  | 13741.p1 | chr11:103104836 | hg19 | G/T | A/S  | missense, probably damaging | N | 0                     |             | V  | 1/1:225:112 | 0/1:215:103 | 0/1:206:146 | 47          | male |      |
| <b>FAM63A</b>   | 13135.p1 | chr1:150972959  | hg19 | A/T | Y/N  | missense, probably damaging | Y | 1.0698/0.2043/0.7766  | rs140386498 | NT | 1/1:120:41  | 0/1:146:48  | 0/1:180:73  | 1/1:135:48  | 80   | male |
| <b>FBF1</b>     | 13076.p1 | chr4:74282070   | hg19 | C/T | A/V  | missense, possibly damaging | N | 0                     |             | NT | 1/1:225:88  | 0/1:179:54  | 0/1:124:25  | 1/1:225:84  | 89   | male |
| <b>FNIP1</b>    | 12224.p1 | chr5:131094624  | hg18 | C/A | G/C  | missense, unknown           | Y | 0.4651/0.0454/0.3229  | rs7730228   | NT | 1/1:96:34   | 1/1:120:43  | 1/1:51:20   | 1/1:105:42  | 80   | male |
| <b>FNIP1</b>    | 13660.p1 | chr5:131094624  | hg18 | C/A | G/C  | missense, unknown           | Y | 0.4651/0.0454/0.3229  | rs7730228   | NT | 1/1:36:13   | 1/1:78:28   | 1/1:69:24   | 1/1:132:49  | 53   | male |
| <b>FNIP1</b>    | 13876.p1 | chr5:131094624  | hg18 | C/A | G/C  | missense, unknown           | Y | 0.4651/0.0454/0.3229  | rs7730228   | NT | 1/1:225:146 | 1/1:225:154 | 1/1:225:146 | 1/1:114:40  | 40   | male |
| <b>GML</b>      | 13076.p1 | chr8:143922642  | hg19 | G/A | none | splice-5                    | Y | 0.0116/2.9278/0.9995  | rs114099899 | V  | 1/1:225:235 | 0/1:228:124 | 0/1:228:66  | 0/1:228:185 | 89   | male |
| <b>GSTA2</b>    | 13175.p1 | chr6:52621101   | hg19 | C/T | E/K  | missense, possibly damaging | Y | 0.0233/1.4539/0.5077  | rs75013911  | NT | 1/1:225:154 | 0/1:137:184 | 0/1:132:166 | 0/1:143:190 | 63   | male |
| <b>HTN3</b>     | 13076.p1 | chr4:70898922   | hg19 | T/A | Y/*  | stop-gained                 | Y | 0.0465/14.5483/4.9592 | rs17147990  | V  | 1/1:225:302 | 0/1:196:159 | 0/1:183:93  | 1/1:225:242 | 89   | male |
| <b>ITGAX</b>    | 12198.p1 | chr16:31382999  | hg19 | G/A | R/L  | missense, probably damaging | Y | 0.0465/0.0/0.0308     | rs146647978 | NT | 1/1:160:61  | 0/1:194:34  | 0/1:180:30  |             | 117  | male |
| <b>KIAA0146</b> | 13076.p1 | chr8:48641518   | hg19 | G/C | C/S  | missense, probably damaging | N | 0                     |             | NT | 1/1:225:146 | 0/1:195:86  | 0/1:102:47  | 0/1:215:139 | 89   | male |
| <b>LEFTY1</b>   | 13076.p1 | chr1:226076583  | hg19 | C/T | M/V  | missense, possibly-damaging | Y | 0.0116/0.4766/0.1692  | rs61995951  | NT | 1/1:145:57  | 0/1:170:21  | 1/1:39:15   | 1/1:111:42  | 89   | male |
| <b>LMBRD1</b>   | 13076.p1 | chr6:70500252   | hg19 | G/A | S/L  | missense, probably damaging | N | 0                     |             | NT | 1/1:225:255 | 0/1:210:124 | 0/1:124:53  | 1/1:225:223 | 89   | male |
| <b>METTL8</b>   | 12304.p1 | chr2:172180771  | hg19 | A/G | *R   | stop-lost                   | Y | 0.0/0.7948/0.2409     | rs10205459  | NT | 1/1:225:322 | 1/1:225:221 | 1/1:225:352 |             | 83   | male |
| <b>MKI67</b>    | 13076.p1 | chr10:129904253 | hg19 | G/T | I/L  | missense, possibly-damaging | Y | 0.0/2.1108/0.7151     | rs34116632  | NT | 1/1:225:412 | 0/1:228:211 | 0/1:228:93  | 1/1:225:291 | 89   | male |
| <b>MROH5</b>    | 12655.p1 | chr8:142459814  | hg19 | C/T | E/G  | missense, possibly damaging | Y | 0.182                 | rs7003306   | NT | 1/1:24:11   | 1/1:18:10   | 1/1:60:28   | 1/1:48:19   | 48   | male |
| <b>MROH5</b>    | 13076.p1 | chr8:142459814  | hg19 | C/T | E/G  | missense, possibly damaging | Y | 0.18                  | rs7003306   | NT | 1/1:96:41   | 1/1:30:14   | 1/1:33:13   | 1/1:33:13   | 89   | male |
| <b>NBN</b>      | 12655.p1 | chr8:90967686   | hg19 | T/C | E/K  | missense, possibly damaging | Y | 0.0/0.8171/0.2768     | rs34120922  | V  | 1/1:102:37  | 0/1:43:27   | 0/1:89:49   |             | 48   | male |
| <b>NECAB1</b>   | 13741.p1 | chr8:91953077   | hg19 | G/T | A/S  | missense, possibly-damaging | Y | 0.012/1.1128/0.3707   | rs115555424 | V  | 1/1:205:71  | 0/1:228:60  | 0/1:228:89  |             | 47   | male |
| <b>OSBPL9</b>   | 13188.p1 | chr1:52231560   | hg19 | C/T | T/I  | missense, possibly damaging | Y | 0.9419/0.1135/0.6612  | rs61739207  | NT | 1/1:225:166 | 0/1:228:65  | 0/1:228:159 |             | 78   | male |
| <b>PAMR1</b>    | 13076.p1 | chr11:35492221  | hg19 | G/A | L/F  | missense, probably damaging | N | 0                     |             | V  | 1/1:225:134 | 0/1:212:77  | 0/1:144:41  |             | 89   | male |
| <b>PCNXL2</b>   | 13076.p1 | chr1:233136061  | hg19 | T/C | R/K  | missense, probably-damaging | Y | 0.0/0.9981/0.3288     | rs116467047 | V  | 1/1:175:81  | 0/1:64:33   | 0/1:31:15   | 0/1:109:56  | 89   | male |
| <b>PKHD1</b>    | 13175.p1 | chr6:51512889   | hg19 | G/A | P/S  | missense, probably damaging | Y | 0.1744/0.0454/0.1307  | rs41273722  | NT | 1/1:225:112 | 0/1:140:105 | 0/1:151:109 | 0/1:176:121 | 63   | male |

|                 |          |                |      |     |      |                                    |   |                            |             |    |             |             |             |             |     |        |
|-----------------|----------|----------------|------|-----|------|------------------------------------|---|----------------------------|-------------|----|-------------|-------------|-------------|-------------|-----|--------|
| <b>PKHD1</b>    | 13175.p1 | chr6:51512889  | hg19 | G/A | P/S  | missense,<br>probably<br>damaging  | Y | 0.1744/0.0454/0.1307       | rs41273722  | NT | 1/1:225:112 | 0/1:140:105 | 0/1:151:109 | 0/1:176:121 | 63  | male   |
| <b>PROB1</b>    | 13076.p1 | chr5:138729609 | hg19 | C/T | V/M  | missense,<br>possibly<br>damaging  | N | 0                          |             | V  | 1/1:102:40  | 0/1:42:22   | 0/1:83:12   | 0/1:196:28  | 89  | male   |
| <b>PRSS48</b>   | 12655.p1 | chr4:152212475 | hg19 | T/C | P/L  | missense,<br>probably<br>damaging  | Y | 0.012/0.0253/0.0163        | rs117303916 | V  | 1/1:225:82  | 0/1:147:58  | 0/1:167:101 | 1/1:225:111 | 48  | male   |
| <b>SMTN</b>     | 13612.p1 | chr22:31487682 | hg19 | C/T | V/A  | missense,<br>probably<br>damaging  | Y | 0.0233/3.7222/1.2763       | rs11913728  | NT | 1/1:39:18   | 0/1:123:20  | 0/1:63:12   | 0/1:94:15   | 52  | male   |
| <b>SMTN</b>     | 13612.p1 | chr22:31479234 | hg19 | G/A | E/G  | missense                           | Y | 0.0116/4.8409/1.6479       | rs11913760  | NT | 1/1:105:41  | 0/1:91:34   | 0/1:116:27  | 0/1:134:38  | 52  | male   |
| <b>TET1</b>     | 12655.p1 | chr10:70333081 | hg19 | T/G | C/F  | missense,<br>possibly<br>damaging  | Y | 0.0349/0.0/0.0231          | rs201095472 | NT | 1/1:54:22   | 0/1:43:14   | 0/1:50:22   |             | 48  | male   |
| <b>TRAF4</b>    | 13393.p1 | chr17:24099461 | hg18 | G/A | A/T  | missense,<br>probably<br>damaging  | Y | 0.7791/0.2043/0.5843       | rs35932778  | NT | 1/1:225:134 | 0/1:228:94  | 0/1:228:82  | 0/1:228:80  | 77  | female |
| <b>TRAPPC9*</b> | 12655.p1 | chr8:140742929 | hg19 | C/T |      | 3'-UTR                             | Y | 2.9                        | rs79408026  | V  |             |             |             |             | 48  | male   |
| <b>UGT2A1</b>   | 13076.p1 | chr4:70512825  | hg19 | C/T | E/K  | missense,<br>probably<br>damaging  | N | 0                          |             | NT | 1/1:138:149 | 0/1:67:65   |             | 1/1:145:88  | 89  | male   |
| <b>UGT2B10</b>  | 13076.p1 | chr4:69687987  | hg19 | C/A | none | splice-3                           | Y | 0.3023/37.1708/12.78<br>84 | rs2942857   | V  | 1/1:225:793 | 1/1:225:355 | 1/1:225:218 | 1/1:225:589 | 89  | male   |
| <b>ZC3H3</b>    | 13076.p1 | chr8:144620293 | hg19 | G/A | L/P  | missense,<br>possibly-<br>damaging | Y | 0.0582/1.8157/0.6536       | rs36008851  | NT | 1/1:220:93  | 0/1:111:44  | 0/1:59:18   | 0/1:111:64  | 89  | male   |
| <b>ZNF107</b>   | 13808.p1 | chr7:63806454  | hg18 | G/A | none | frameshift                         | N | 0                          |             | NT | 1/1:172:65  | 1/1:24:11   | 1/1:181:64  | 1/1:111:47  | 72  | male   |
| <b>ZNF138</b>   | 13808.p2 | chr7:63928768  | hg18 | T/A | F/Y  | missense,<br>unknown               | Y | 0.0314/4.9133/1.5112       |             | NT | 1/1:225:347 | 1/1:193:93  | 1/1:225:322 | 1/1:225:290 | 72  | male   |
| <b>ZNF785</b>   | 12198.p1 | chr16:30594521 | hg19 | A/C | V/G  | missense,<br>probably<br>damaging  | Y | 1.186/0.1593/0.8388        | rs35215913  | NT | 1/1:24:9    | 0/1:45:12   | 0/1:9:13    |             | 117 | male   |

Whole exome sequencing data available for the SSC dataset was analyzed. Regions more common in probands compared to siblings were chosen. A genome-wide analysis was performed to find number of probands and siblings with ROH in 1 Mb regions. In each region, if number of probands with ROH is higher compared to number of siblings, that region was investigated for variants. Polyphen 2 and exome variant server were used to filter the variants in those regions. Identified variants were experimentally validated depending on the availability of DNA sample. Twenty-four variants were confirmed by Sanger sequencing and all SNVs were deemed to be true call and we thereby estimate call efficacy in the range of 100%.

\*Represent variants found by experimental validation only, not in the whole exome data analysis.

**Table S5. Phenotype-Genotype Analysis of Female and Male Probands with and without ROH for Cognition, Adaptive Functioning, ADOS, and ADI-R**

|                                 | Entire Sample<br>(n = 2066) | Females with ROH<br>(n = 102) | Females without ROH<br>(n = 175) | Males with ROH<br>(n = 648) | Males without ROH<br>(n = 1141) | p Values                      |                           |
|---------------------------------|-----------------------------|-------------------------------|----------------------------------|-----------------------------|---------------------------------|-------------------------------|---------------------------|
|                                 | Mean (SD)                   | Mean (SD)                     | Mean (SD)                        | Mean (SD)                   | Mean (SD)                       | Females ROH to Females No ROH | Males ROH to Males No ROH |
| <b>Cognition</b>                |                             |                               |                                  |                             |                                 |                               |                           |
| Full-scale IQ                   | 81.9 (27.7)                 | 74.1(31.2)                    | 76(25.7)                         | 80.2(28.6)                  | 84.4(26.9)                      | 0.57                          | 0.002                     |
| Verbal IQ                       | 78.9 (30.9)                 | 73.2(34.7)                    | 75.2(30)                         | 76.8(31.8)                  | 81.1(30)                        | 0.59                          | 0.004                     |
| Non-verbal IQ                   | 85.2 (25.9)                 | 76.4(28.7)                    | 78.6(24)                         | 83.8(26.5)                  | 87.8(25.2)                      | 0.49                          | 0.001                     |
| Verbal mental age               | 90.0 (47.7)                 | 75.9(51.1)                    | 76.4(46.8)                       | 81.2(52.3)                  | 84.8(51.7)                      | 0.75                          | 0.11                      |
| Non-verbal Mental age           | 82.5 (51.5)                 | 79.9(44.6)                    | 81(41.6)                         | 89.3(48.3)                  | 92.7(48.2)                      | 0.84                          | 0.15                      |
| <b>Adaptive Functioning</b>     |                             |                               |                                  |                             |                                 |                               |                           |
| Composite score                 | 73.6 (11.9)                 | 71.3(13.4)                    | 71.4(10.9)                       | 72.8(12.1)                  | 74.6(11.8)                      | 0.91                          | 0.003                     |
| Communication                   | 77.7 (14.5)                 | 75.1(16.3)                    | 75.3(12.7)                       | 76.5(14.9)                  | 78.9(14.2)                      | 0.89                          | 0.001                     |
| Social                          | 71.4 (12.4)                 | 69.3(13.8)                    | 70.3(11.8)                       | 70.6(12.3)                  | 72.2(12.4)                      | 0.52                          | 0.01                      |
| Daily living skills             | 76.8 (13.7)                 | 73.6(14.7)                    | 74.7(12.6)                       | 75.9(13.9)                  | 77.9(13.6)                      | 0.52                          | 0.004                     |
| Motor skills                    | 81.8 (12.8)                 | 82.1(15.3)                    | 78.2(13.5)                       | 82(12.4)                    | 82.2(12.6)                      | 0.13                          | 0.88                      |
| <b>ADOS</b>                     |                             |                               |                                  |                             |                                 |                               |                           |
| Calibrated severity score       | 7.4 (1.7)                   | 7.3(1.6)                      | 7.4(1.8)                         | 7.5(1.7)                    | 7.4(1.7)                        | 0.54                          | 0.69                      |
| Social affect                   | 11.0 (4.0)                  | 11.2(4.1)                     | 11.6(4.3)                        | 11.1(4)                     | 10.9(4)                         | 0.45                          | 0.24                      |
| Restricted/ repetitive behavior | 4.0 (2.1)                   | 4(2.3)                        | 3.8(2.1)                         | 4.1(2.1)                    | 3.9(2)                          | 0.41                          | 0.12                      |
| Communication                   | 4.5 (2.1)                   | 4.6(2.2)                      | 4.7(2.3)                         | 4.4(2.1)                    | 4.4(2.1)                        | 0.88                          | 0.69                      |
| Reciprocal social               | 8.2 (2.6)                   | 8.3(2.7)                      | 8.5(2.8)                         | 8.3(2.6)                    | 8(2.5)                          | 0.56                          | 0.07                      |
| <b>ADI-R</b>                    |                             |                               |                                  |                             |                                 |                               |                           |
| Social                          | 20.2 (5.7)                  | 20.1(5.8)                     | 20.3(6.1)                        | 20.4(5.8)                   | 20.1(5.6)                       | 0.85                          | 0.30                      |
| Restricted/ repetitive behavior | 6.5 (2.5)                   | 6.1(2.3)                      | 6.2(2.3)                         | 6.6(2.5)                    | 6.6(2.5)                        | 0.78                          | 1.00                      |
| Communication Non-verbal        | 9.2 (3.5)                   | 9.2(3.5)                      | 9.1(3.7)                         | 9.3(3.5)                    | 9.2(3.4)                        | 0.97                          | 0.62                      |
| Communication verbal            | 16.4 (4.3)                  | 16.3(4.2)                     | 16.7(4.3)                        | 16.4(4.4)                   | 16.4(4.2)                       | 0.50                          | 0.70                      |
| Social                          | 20.2 (5.7)                  | 20.1(5.8)                     | 20.3(6.1)                        | 20.4(5.8)                   | 20.1(5.6)                       | 0.85                          | 0.30                      |

Minimum final segment size used was 2500 kb. Phenotype-genotype analysis was performed to compare female and male probands with and without ROH in terms of IQ measures, the Vineland Adaptive Scales, and autism measures as reported by the ADI-R, the ADOS, the calibrated ADOS severity score. All tests were conducted in SAS version 9.2. Generalized Linear Model (GLM) was used to compute least squares means for each group.



**Table S6. An Increase in Burden of Autosomal ROH in Females with Autism as Compared to Unaffected Female Siblings**

| Female Pairs                                |                        |                                   |            |         | Male Pairs              |                                   |            |         |
|---------------------------------------------|------------------------|-----------------------------------|------------|---------|-------------------------|-----------------------------------|------------|---------|
| Minimum Segment Size (kb)                   | Probands± SE (n = 124) | Designated Sibling ± SE (n = 124) | Odds Ratio | P Value | Probands ± SE (n = 672) | Designated Sibling ± SE (n = 672) | Odds Ratio | P Value |
| <b>Average Total Length of ROH (Mb)</b>     |                        |                                   |            |         |                         |                                   |            |         |
| 1000                                        | 28.62±1.06             | 27.76±0.94                        | 1.14       | 0.24    | 28.26±0.51              | 28.46±0.48                        | 0.97       | 0.55    |
| 1750                                        | 6.59±0.47              | 5.93±0.4                          | 1.28       | 0.17    | 5.93±0.3                | 6.21±0.25                         | 0.91       | 0.20    |
| 2000                                        | 4.49±0.38              | 3.80±0.33                         | 1.47       | 0.080   | 3.91±0.29               | 4.06±0.23                         | 0.94       | 0.45    |
| 2500                                        | 2.41±0.31              | 1.61±0.23                         | 2.31       | 0.008   | 2.06±0.27               | 2.00±0.20                         | 1.03       | 0.77    |
| 3000                                        | 1.31±0.23              | 0.89±0.17                         | 2.35       | 0.048   | 1.24±0.25               | 1.22±0.19                         | 1.01       | 0.90    |
| 3500                                        | 0.77±0.20              | 0.47±0.15                         | 2.62       | 0.09    | 0.90±0.25               | 0.81±0.18                         | 1.06       | 0.58    |
| <b>Average Number of Blocks</b>             |                        |                                   |            |         |                         |                                   |            |         |
| 1000                                        | 20.68±0.75             | 20.28±0.67                        | 1.03       | 0.42    | 20.61±0.31              | 20.69±0.32                        | 0.99       | 0.69    |
| 1750                                        | 2.80±0.19              | 2.62±0.17                         | 1.08       | 0.36    | 2.47±0.07               | 2.64±0.08                         | 0.91       | 0.02    |
| 2000                                        | 1.67±0.13              | 1.48±0.13                         | 1.16       | 0.18    | 1.38±0.06               | 1.49±0.06                         | 0.90       | 0.06    |
| 2500                                        | 0.73±0.09              | 0.48±0.07                         | 1.65       | 0.01    | 0.55±0.037              | 0.55±0.035                        | 0.98       | 0.84    |
| 3000                                        | 0.32±0.052             | 0.22±0.039                        | 1.84       | 0.06    | 0.24±0.025              | 0.26±0.024                        | 0.90       | 0.38    |
| 3500                                        | 0.15±0.04              | 0.09±0.03                         | 2.40       | 0.09    | 0.137±0.02              | 0.14±0.02                         | 0.97       | 0.87    |
| <b>Average Block Length per Person (Mb)</b> |                        |                                   |            |         |                         |                                   |            |         |
| 1000                                        | 1.38±0.013             | 1.36±0.01                         | 35.22      | 0.26    | 1.36±0.008              | 1.36±0.007                        | 0.70       | 0.73    |
| 1750                                        | 2.07±0.08              | 1.94±0.09                         | 1.73       | 0.20    | 1.97±0.04               | 2.31±0.12                         | 0.83       | 0.004   |
| 2000                                        | 1.96±0.12              | 1.81±0.13                         | 1.41       | 0.26    | 1.78±0.05               | 1.81±0.06                         | 0.93       | 0.55    |
| 2500                                        | 1.47±0.16              | 1.22±0.17                         | 1.37       | 0.17    | 1.22±0.07               | 1.23±0.07                         | 0.99       | 0.95    |
| 3000                                        | 1.14±0.18              | 0.86±0.16                         | 1.46       | 0.11    | 0.79±0.07               | 0.84±0.07                         | 0.94       | 0.50    |
| 3500                                        | 0.69±0.17              | 0.47±0.15                         | 1.49       | 0.17    | 0.53±0.07               | 0.53±0.06                         | 1.00       | 0.99    |
| <b>Proportion of Subjects with ROH</b>      |                        |                                   |            |         |                         |                                   |            |         |
| 1000                                        | 1:1                    | 1:1                               |            | 1       | 1:1                     | 1:1                               |            | 1       |
| 1750                                        | 0.90:1                 | 0.85:1                            |            | 0.26    | 0.86:1                  | 0.85:1                            |            | 0.35    |
| 2000                                        | 0.74:1                 | 0.69:1                            |            | 0.40    | 0.68                    | 0.69                              |            | 0.77    |
| 2500                                        | 0.44:1                 | 0.35:1                            |            | 0.15    | 0.37:1                  | 0.37:1                            |            | 0.97    |
| 3000                                        | 0.28:1                 | 0.21:1                            |            | 0.18    | 0.19:1                  | 0.21:1                            |            | 0.41    |
| 3500                                        | 0.14:1                 | 0.09:1                            |            | 0.23    | 0.10:1                  | 0.11:1                            |            | 0.93    |

ROH was calculated using PLINK for a minimal final segment of 1000-3500 kb. Including those without ROH, average total length of ROH, average number of blocks and average block length were compared for the same gender proband and designated sibling pairs. A conditional logistic regression model in STATA version 11.1 was used to calculate statistical significance for average total length of ROH, average number of blocks and average block length per person. Odds Ratios were calculated for total length of ROH and average block size based on per 5 Mb and 2.5 Mb incremental increase respectively. Statistical significance of proportion of subjects with ROH was obtained by chi-square test. Female probands were observed to have higher average number of blocks and higher average total length of ROH compared to their designated siblings ( $p < 0.05$ ) for final segment of 2500 kb. No statistically significant difference was found in the comparison of male probands to their designated siblings in terms of ROH burden ( $p > 0.05$ ).

**Table S7. Logistic Regression Analysis of Gender, ID, and ROH (Defined as Having ROH or no ROH) (Final segment size of 2500 kb) in Simplex Autism**

| Predictors                                           | Unadjusted |           |         | Adjusted |           |         |
|------------------------------------------------------|------------|-----------|---------|----------|-----------|---------|
|                                                      | OR         | 95% CI    | p Value | OR       | 95% CI    | p Value |
| <b>Modeling Probability of ID in Simplex Autism</b>  |            |           |         |          |           |         |
| Gender (female vs. male)                             | 1.85       | 1.43 2.40 | <0.0001 | 1.85     | 1.43 2.40 | <0.0001 |
| ROH (yes/no)                                         | 1.25       | 1.03 1.52 | 0.02    | 1.26     | 1.04 1.52 | 0.02    |
| <b>Modeling Probability of ROH in Simplex Autism</b> |            |           |         |          |           |         |
| Gender (female vs. male)                             | 0.98       | 0.76 1.28 | 0.90    | 0.95     | 0.73 1.24 | 0.72    |
| ID (ID vs. non-ID)                                   | 1.25       | 1.03 1.52 | 0.02    | 1.26     | 1.04 1.52 | 0.02    |

Logistic regression analyses in SAS version 9.2 were run to predict the association between gender, ID and ROH in affected probands. We fit simple logistic models to obtain unadjusted odds ratios and 95% confidence intervals and adjusted models to obtain adjusted odds ratios and 95% confidence intervals. We modeled the probability of having ID by gender and ROH; and the probability of having ROH by gender and ID.

<sup>1</sup>Adjusted model includes both gender and ROH as opposed to the unadjusted model, which includes each risk factor individually.

<sup>2</sup>Adjusted model includes both gender and ID as opposed to the unadjusted model, which includes each risk factor individually.
